# Supplementary material
Source: PubMed Central journal article supplement (PMC2689997)
Supplement: 0900517106_0900517106SI.pdf [file 0900517106_0900517106SI.pdf]

# Supporting Information

Cooke et al. 10.1073/pnas.0900517106

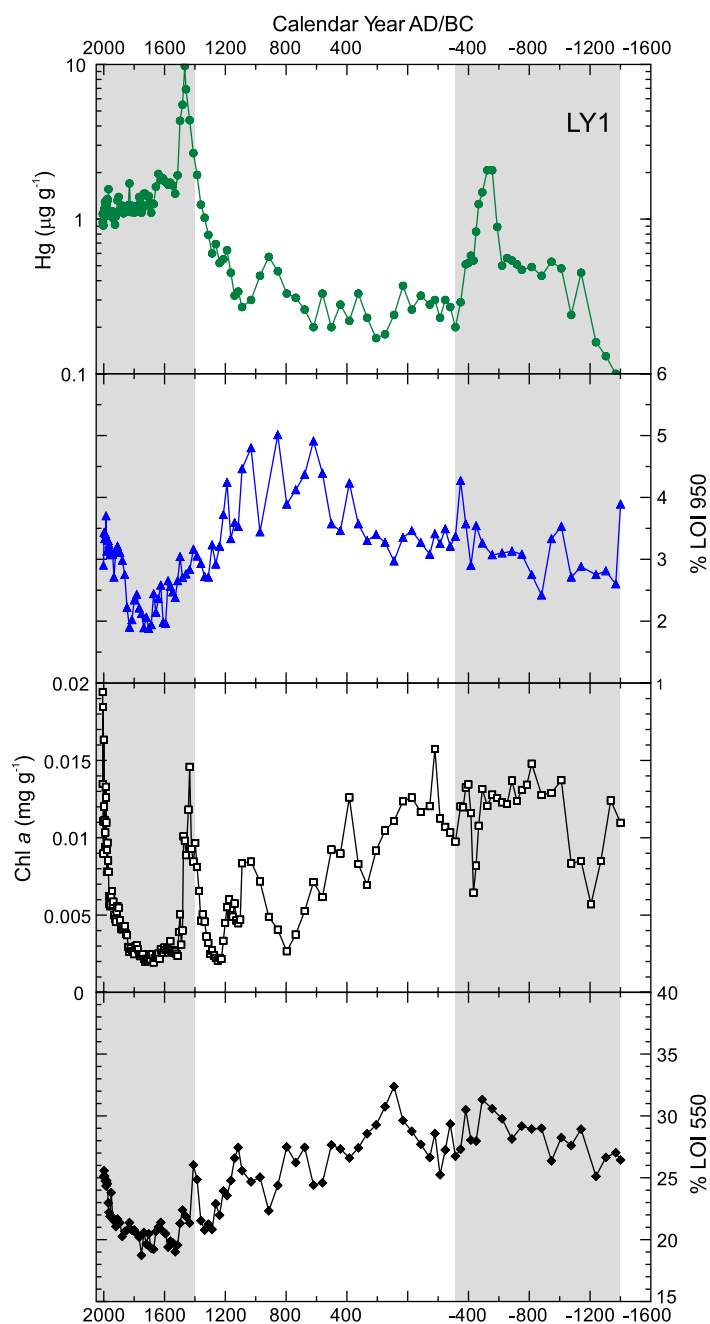

**Fig. S1.** Geochemical and organic matter profiles from core LY1. Significant increases in Hg are shaded and cannot be attributable to rapid increases in other sediment variables. Both within-lake primary production and total organic matter burial have been shown to influence the accumulation of Hg within lake sediments [Outridge PM, et al. (2007) *Environ Sci Tech* 41:5259–5265]. There is no correlation between Hg and Chl a ( $r^2 = 0.01$ ), and Hg and % LOI 550 ( $r^2 = -0.15$ ). The exception is an obvious large peak in both Hg and Chl a centered at ca. 1450 AD. However, similar Chl a concentrations (e.g., ca. 200 BC) yield no net increase in Hg, and no increase in Hg is noted in modern sediments when Chl a attains its highest levels (0.02 mg/g).

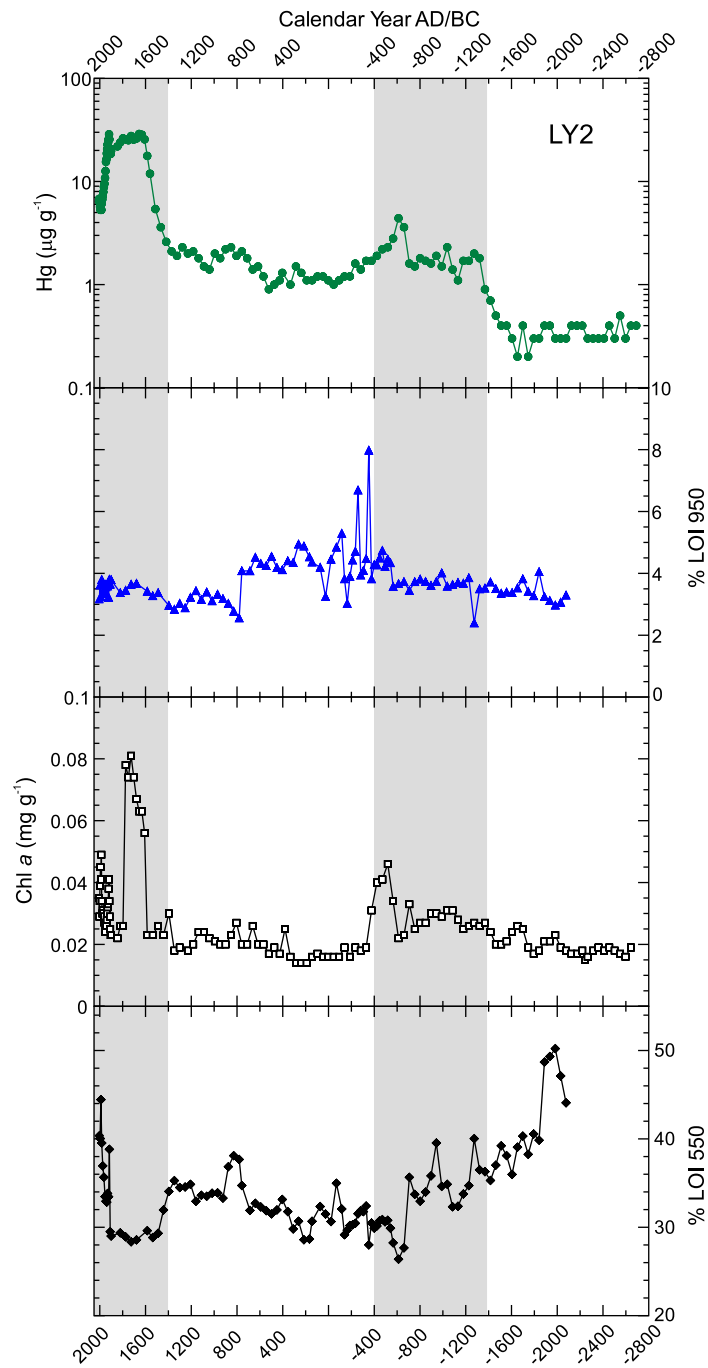

**Fig. S2.** Geochemical and organic matter profiles from core LY2. As observed at LY1, increases in Hg are shaded and cannot be attributable to rapid increases in other sediment variables.

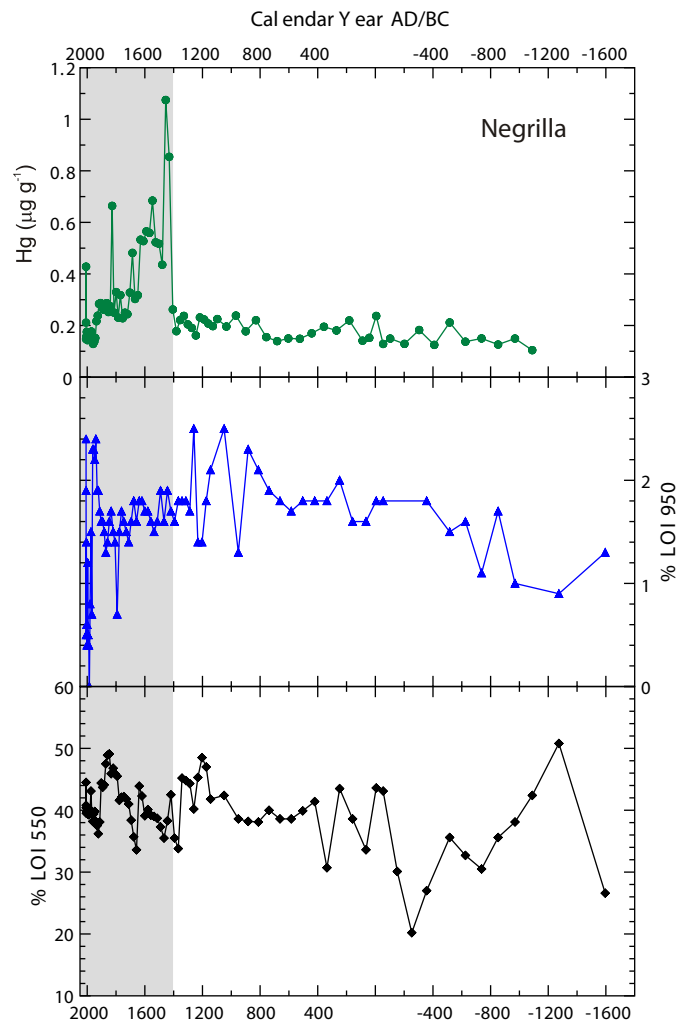

**Fig. S3.** Geochemical and organic matter profiles from Negrilla. As with LY1 and LY2, increases in Hg are shaded and cannot be attributable to rapid increases in other sediment variables.

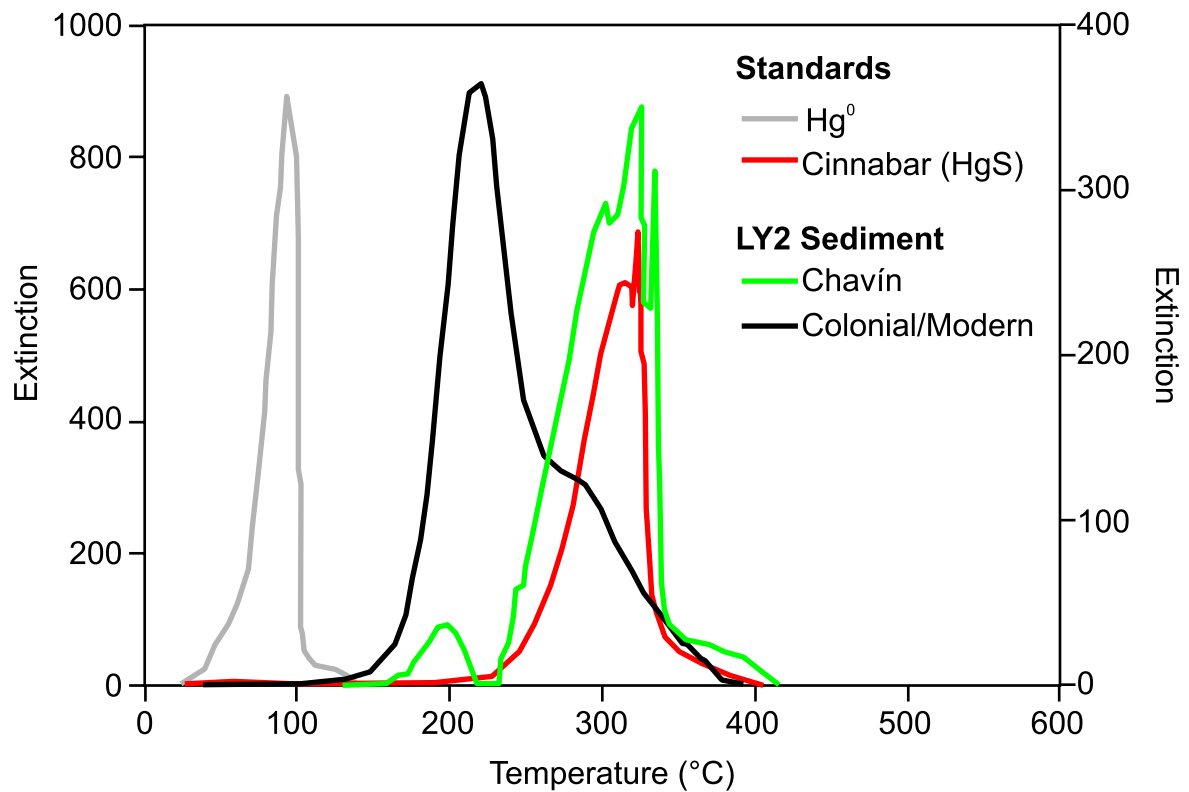

**Fig. S4.** Solid-phase Hg thermo-desorption curves of standard materials and selected sediment samples of the LY2 core. The Chavín and Colonial/Modern samples are from 80 and 8.5 cm depth respectively. The Colonial/Modern sample-peak lies between Hg<sup>0</sup> and cinnabar, indicating the presence of matrix-bound Hg, a fraction which is largely bound to organic matter, but may also include particulate-bound Hg (1). Cinnabar and Hg<sup>0</sup> standard samples were obtained from the Idrija mercury mine, Slovenia (2).

1. Biester H, Scholz C (1997) Determination of mercury binding forms in contaminated soils: mercury pyrolysis versus sequential extractions. *Environ Sci Tech* 31:233–239.
2. Biester H, Gosar M, Covelli S (2000) Mercury speciation in sediments affected by dumped mining residues in the drainage area of the Idrija mercury mine, Slovenia. *Environ Sci Tech* 34:3330–3336.



**Table S2. Table of radiocarbon determinations for the three study cores**

| UCI ID | Lake     | Depth, cm | Sample size, mg of C | <sup>14</sup> C age BP | 2 $\sigma$ calibrated range | Median date |
|--------|----------|-----------|----------------------|------------------------|-----------------------------|-------------|
| 51338  | LY1      | 45.5–46.5 | 0.10                 | 520 $\pm$ 15           | 1420–1450 AD                | 1435 AD     |
| 49762  | LY1      | 60–60.5   | 0.21                 | 1020 $\pm$ 20          | 1020–1150 AD                | 1090 AD     |
| 44752  | LY1      | 80–82     | 0.11                 | 2175 $\pm$ 25          | 345–50 BC                   | 145 BC      |
| 49764  | LY1      | 90.5–91   | 0.18                 | 2460 $\pm$ 20          | 730–400 BC                  | 475 BC      |
| 49763  | LY1      | 95.5–96   | 0.11                 | 2675 $\pm$ 25          | 835–675 BC                  | 800 BC      |
| 51339  | LY2      | 36–37.5   | 0.04                 | 1285 $\pm$ 30          | 690–885 AD                  | 790 AD      |
| 49759  | LY2      | 56–57.5   | 0.18                 | 2225 $\pm$ 20          | 360–115 BC                  | 260 BC      |
| 49760  | LY2      | 87.5–89.5 | 0.14                 | 3390 $\pm$ 20          | 1690–1525 BC                | 1620 BC     |
| 51337  | Negrilla | 49.5–50   | 0.16                 | 3170 $\pm$ 15          | 1450–1610 AD                | 1465 AD     |
| 56388  | Negrilla | 87.5–88   | 0.04                 | 2060 $\pm$ 45          | 165 BC–115 AD               | 10 BC       |
| 49765  | Negrilla | 112.5–114 | 0.05                 | 440 $\pm$ 45           | 1495–1260 BC                | 1390 BC     |

**Table S3. Table of blank values, average relative standard deviations, and recoveries of standard reference materials associated with DMA80 measurement of Hg**

|                                            | LY1       | LY2      | Negrilla  |
|--------------------------------------------|-----------|----------|-----------|
| Blanks, ng/g ( <i>n</i> )                  | 1.4 (25)  | 4.0 (14) | 0.5 (24)  |
| Duplicates, avg. % difference ( <i>n</i> ) | 15% (14)  | 12% (10) | 4% (20)   |
| MESS-3, avg. % recovery ( <i>n</i> )       | 101% (11) | 100% (7) | 97% (14)  |
| PACS-2, avg. % recovery ( <i>n</i> )       | 97% (11)  | 101% (6) | 101% (11) |
